# Supplementary material for: Chronic glucose-dependent insulinotropic polypeptide receptor (GIPR) agonism desensitizes adipocyte GIPR activity mimicking functional GIPR antagonism
Source: PubMed Central journal article supplement (PMC7536395; doi:10.1038/s41467-020-18751-8), 2020-10-05
Supplement: 41467_2020_18751_MOESM1_ESM.pdf [file 41467_2020_18751_MOESM1_ESM.pdf]

**Supplemental Information for “Chronic glucose-dependent insulinotropic polypeptide receptor (GIPR) agonism desensitizes adipocyte GIPR activity mimicking functional GIPR antagonism”**

Supplemental Figures 1-5 and Legends...page 2

Supplemental Table 1 and Legend.....page 7

Supplemental Data 1 Legend.....page 7

## Supplemental Figure 1

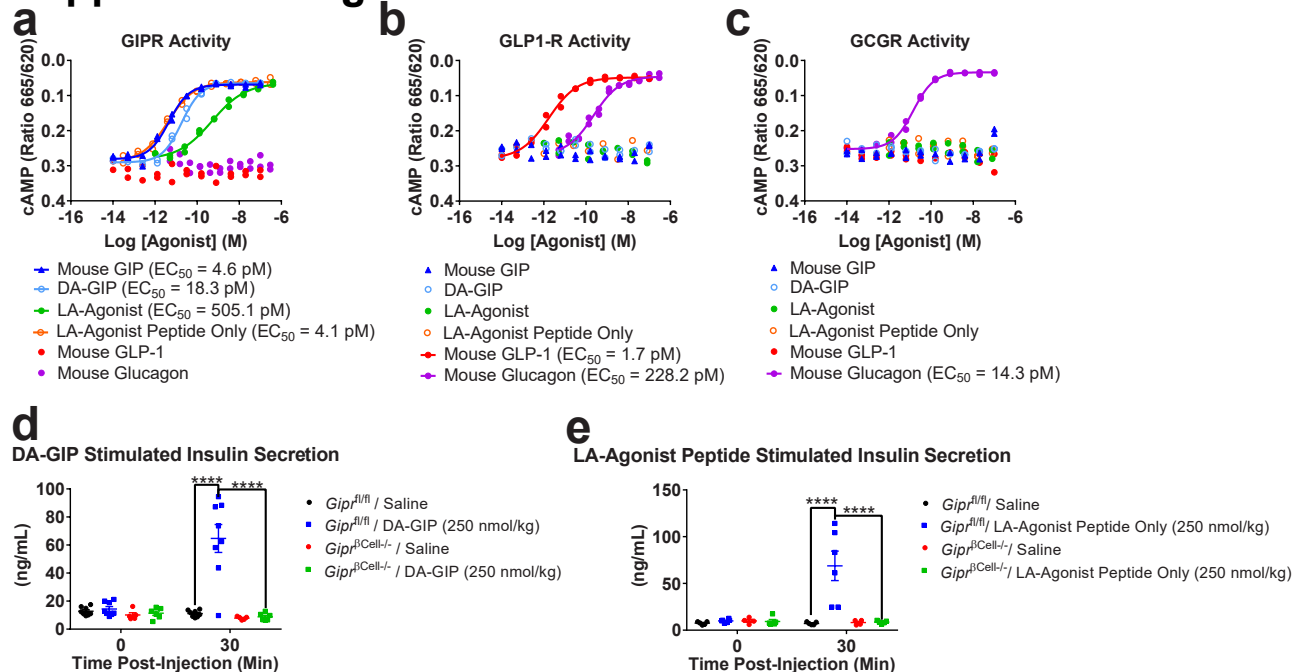

### Supplemental Figure 1. The long-acting GIPR agonist is specific for GIPR.

(A-C) cAMP measurements of agonist activity of mouse GIP, DA-GIP, LA-Agonist, LA-Agonist peptide only, mouse GLP-1, and mouse glucagon in cell lines overexpressing (A) GIPR, (B) GLP1-R, or (C) glucagon receptor.  $n = 2$  wells/treatment.

(D)  $Gipr^{fl/fl}$  and  $Gipr^{\beta Cell^{-/-}}$  mice fed HFD for 18 weeks were fasted for 6 hours then RO bled for T0, immediately IP injected with glucose (0.5 g/kg) and saline or glucose (0.5 g/kg) and DA-GIP (250 nmol/kg), then blood collected by RO bleed after 30 min. Plasma insulin was measured by ELISA.  $n = 8$  mice/group  $Gipr^{fl/fl}$  / Saline and  $Gipr^{fl/fl}$  / DA-GIP,  $n = 5$  mice  $Gipr^{\beta Cell^{-/-}}$  / Saline, and  $n = 6$  mice  $Gipr^{\beta Cell^{-/-}}$  DA-GIP; \*\*\*\* $p < 0.0001$ , two-way repeated measure ANOVA with Tukey's HSD for multiple comparisons. Data are presented as mean values  $\pm$  SEM.

(E)  $Gipr^{fl/fl}$  and  $Gipr^{\beta Cell^{-/-}}$  mice fed HFD for 8 weeks were fasted for 6 hours then RO bled for T0, immediately IP injected with glucose (0.5 g/kg) and saline or glucose (0.5 g/kg) and LA-Agonist peptide only (250 nmol/kg), then blood collected by RO bleed after 30 min. Plasma insulin was measured by ELISA.  $n = 5$  mice  $Gipr^{fl/fl}$  / Saline,  $n = 6$  mice  $Gipr^{fl/fl}$  / LA-Agonist Peptide Only,  $n = 4$  mice  $Gipr^{\beta Cell^{-/-}}$  / Saline, and  $n = 5$  mice  $Gipr^{\beta Cell^{-/-}}$  LA-Agonist Peptide Only; \*\*\*\* $p < 0.0001$ , two-way repeated measure ANOVA with Tukey's HSD for multiple comparisons. Data are presented as mean values  $\pm$  SEM.

## Supplemental Figure 2

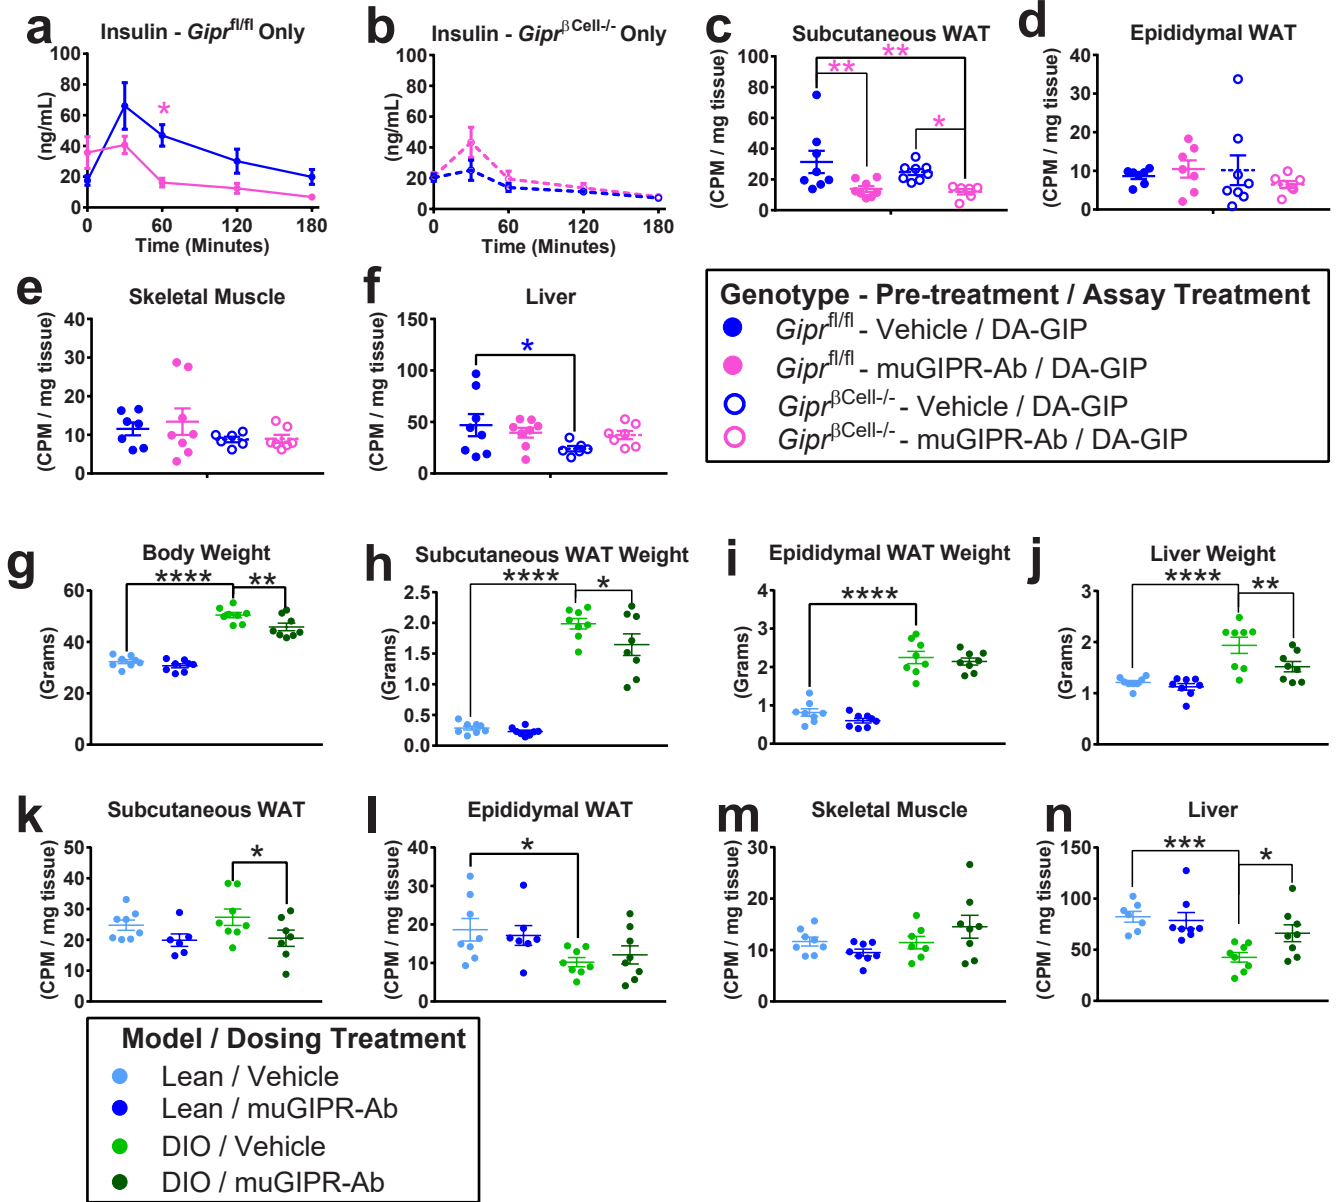

### Supplemental Figure 2. GIP stimulated FA uptake into adipose tissue is not dependent on GIP-stimulated insulin secretion and is inhibited after chronic muGIPR-Ab treatment.

(A-F) *Gipr*<sup>fl/fl</sup> and *Gipr* <sup>$\beta$ Cell-/-</sup> mice fed HFD for 13 weeks pre-treated with a single injection of vehicle or muGIPR-Ab (25 mg/kg) for 24 hours then injected with DA-GIP and simultaneously oral gavaged with 14C-oleic acid in olive oil to assess FA uptake. Plasma insulin measured over time in (A) *Gipr*<sup>fl/fl</sup> mice and (B) *Gipr* <sup>$\beta$ Cell-/-</sup> mice, \**p* = 0.020. Radioactivity uptake into metabolically relevant tissues was measured at necropsy 180 min post-dose in (C) scWAT, (D) eWAT, (E) skeletal muscle, and (F) liver; (C) *Gipr*<sup>fl/fl</sup>/DA-GIP vs. *Gipr*<sup>fl/fl</sup>/muGIPR-Ab + DA-GIP \*\**p* = 0.0054, *Gipr*<sup>fl/fl</sup>/DA-GIP vs. *Gipr* <sup>$\beta$ Cell-/-</sup>/muGIPR-Ab + DA-GIP \*\**p* = 0.0044, *Gipr* <sup>$\beta$ Cell-/-</sup>/DA-GIP vs. *Gipr* <sup>$\beta$ Cell-/-</sup>/muGIPR-Ab + DA-GIP \**p* = 0.49; (F) *Gipr*<sup>fl/fl</sup>/DA-GIP vs. *Gipr* <sup>$\beta$ Cell-/-</sup>/DA-GIP \**p* = 0.032. (A) *n* = 8 mice/group, (B) *n* = 7 mice/group, (C-F) *n* = 8 *Gipr*<sup>fl/fl</sup> mice/group and *n* = 7 *Gipr* <sup>$\beta$ Cell-/-</sup> mice/group; (A, B) two-way repeated measures ANOVA with Sidak's test for multiple comparisons or (C-F) one-way ANOVA with Fisher's posthoc test, \**p* < 0.05 and \*\**p* < 0.01. Data are presented as mean values  $\pm$  SEM.

(G-N) Lean and DIO mice treated with vehicle or muGIPR-Ab (25 mg/kg every 6 days) for 41 days then injected with DA-GIP and simultaneously oral gavaged with 14C-oleic acid in olive oil to assess FA uptake. (G) Body weight, (H) scWAT weight, (I) eWAT weight, and (J) liver weight at necropsy; (G) \*\*\*\**p* < 0.0001 and \*\**p* = 0.0045, (H) \*\*\*\**p* < 0.0001 and \**p* = 0.023, (I) \*\*\*\**p* < 0.0001, and (J) \*\*\*\**p* < 0.0001 and \*\**p* = 0.0066. Radioactivity uptake into metabolically relevant tissues was measured at necropsy 180 min post-dose in (K) scWAT, (L) eWAT, (M) SKM, and (N) liver. (K) \**p* = 0.045, (L) \**p* = 0.015, and (N) \*\*\**p* = 0.0004 and \**p* = 0.019. One-way ANOVA with Fisher's posthoc test, \**p* < 0.05, \*\**p* < 0.01, \*\*\**p* < 0.001, and \*\*\*\**p* < 0.0001. Data represent means  $\pm$  SEM of *n* = 8 mice/group.

## Supplemental Figure 3

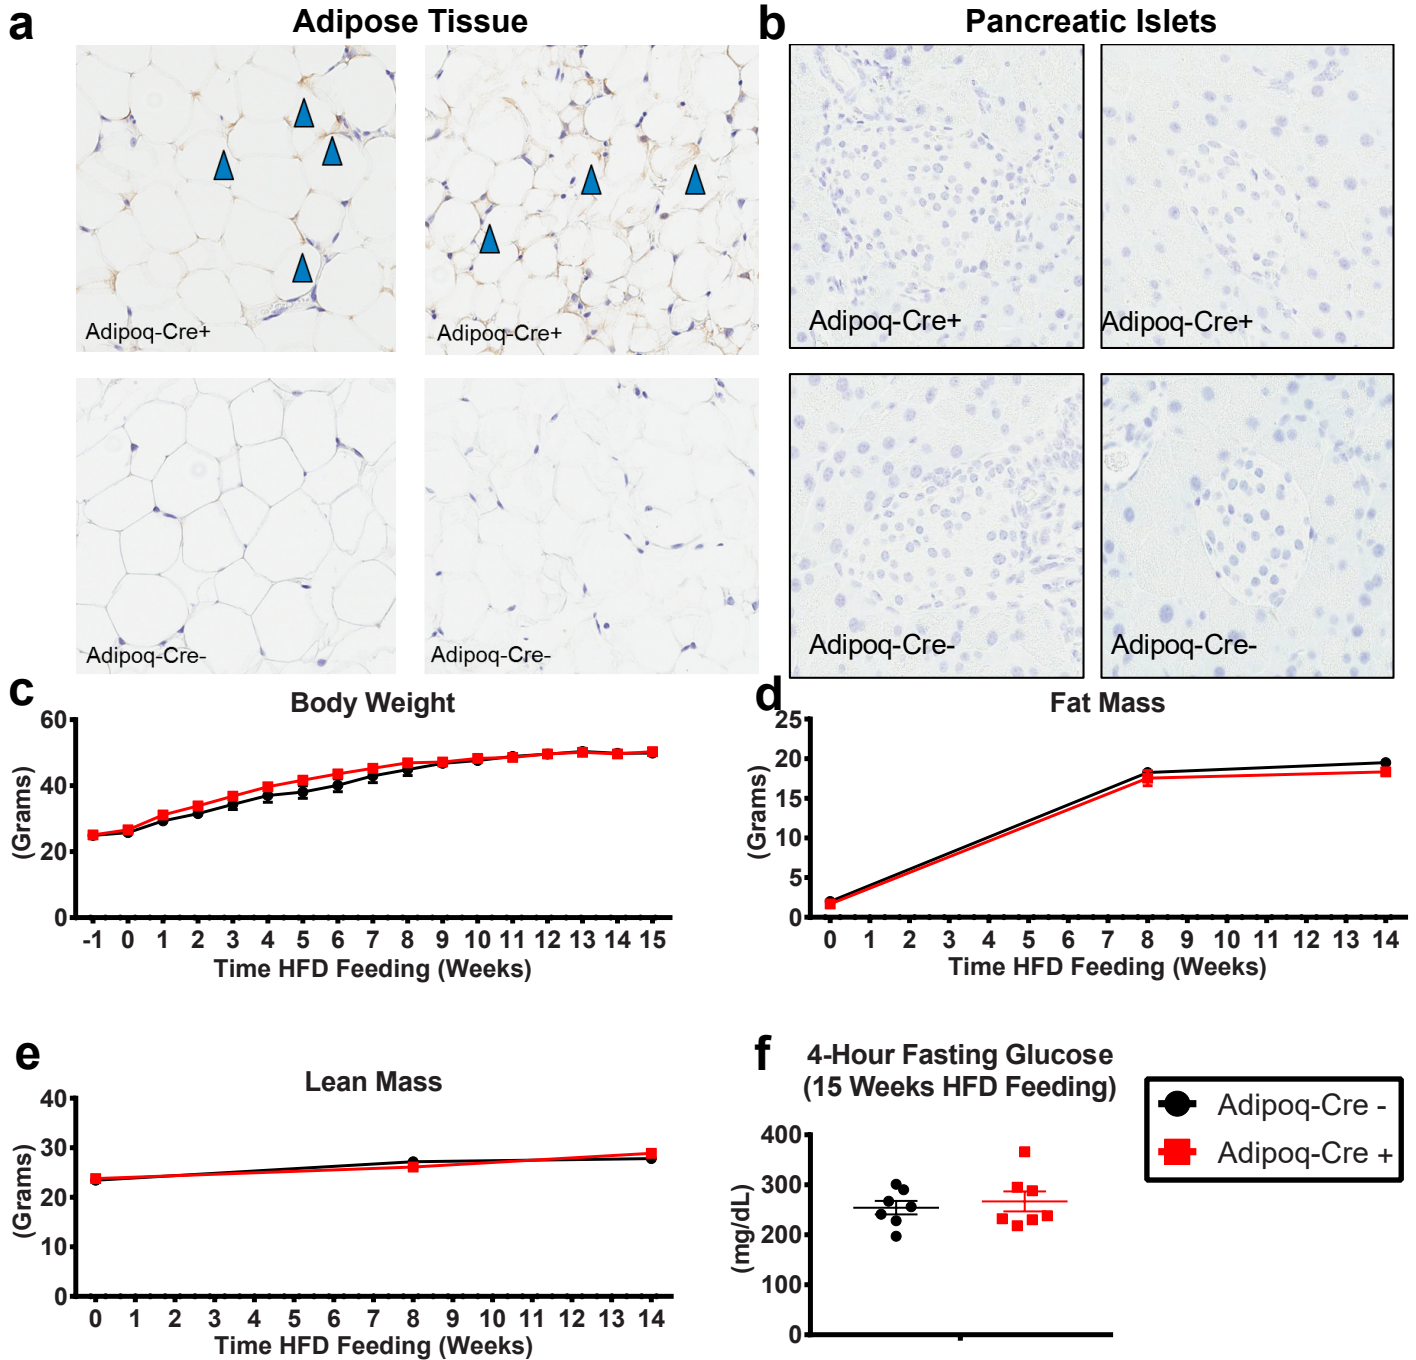

### Supplemental Figure 3. Phenotype of adiponectin-Cre mice.

(A-B) Representative images of  $\beta$ -galactosidase staining in (A) adipose tissue and (B) pancreatic islets of mice produced from mating R26R x Adipoq-Cre mice to confirm Adipoq-Cre mice specifically express Cre recombinase adipose tissue and not in pancreatic islets (negative control). Reproductive tissues also were assessed, and no staining was detected (data not shown).

(C-F) Male Adipoq-Cre- and Adipoq-Cre+ littermates fed HFD for 15 weeks. (C) Body weight, (D) fat mass, and (E) lean mass measured over time. (F) 4-hour fasting blood glucose from terminal decapitation blood collection after 15 weeks HFD feeding.  $n = 7$  mice/group. Data are presented as mean values  $\pm$  SEM.

Supplemental Figure 4

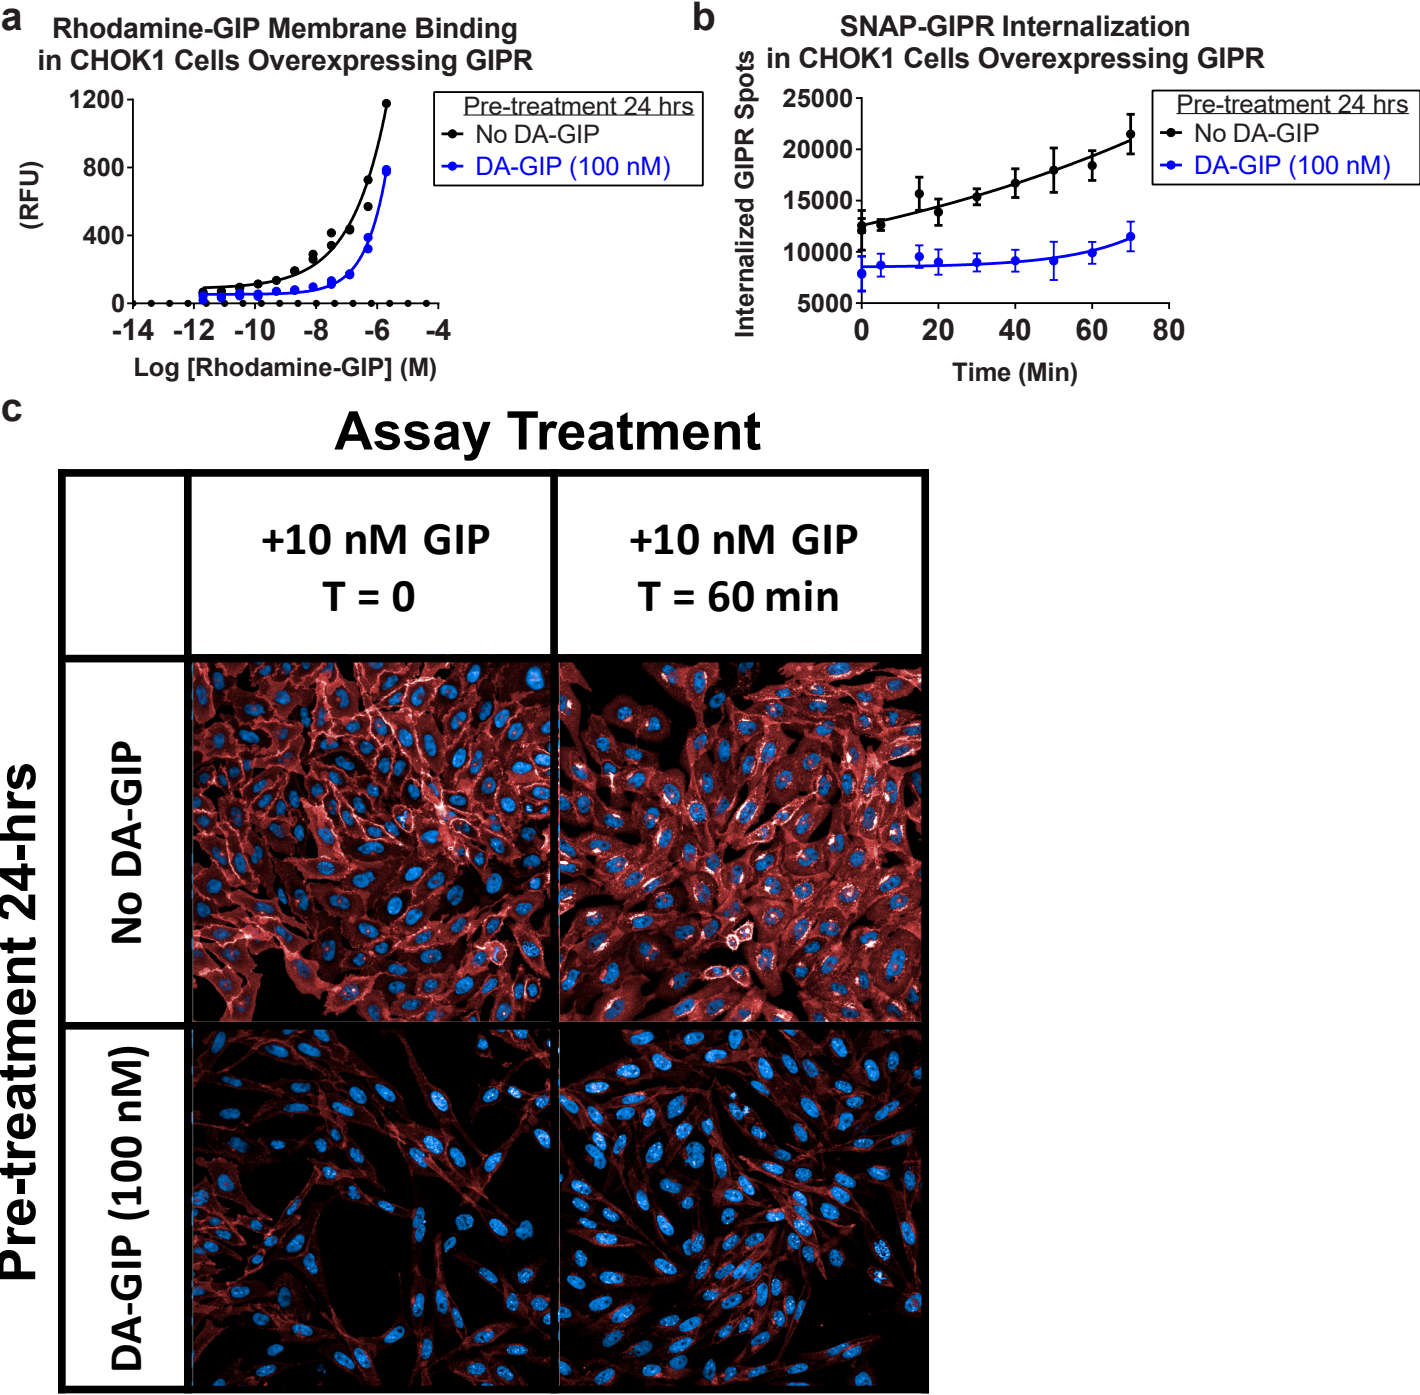

**Supplemental Figure 4. Reduced plasma membrane GIPR expression after chronic GIP treatment.**

(A) Rhodamine intensity measurement of CHOK1+GIPR cells pre-treated with or without DA-GIP (100 nM) for 24 hours followed by incubation with rhodamine-GIP on ice for 60 min; n = 2 wells/treatment.

(B-C) Time course comparison of GIPR internalization upon stimulation with GIP (10 nM) in CHOK1+SNAP-GIPR cells labeled with cell impermeable SNAP-Surface Alexa Fluor 647 substrate that only adds the fluorescent tags to GIPR on the plasma membrane. Prior to labeling, cells were pre-treated with or without DA-GIP (100 nM) for 24 hours. Quantitated membrane GIPR fluorescence (RFU) with background fluorescence subtracted (B) and representative images (C), n = 4 wells/treatment. Data are presented as mean values +/- SEM.

## Supplemental Figure 5

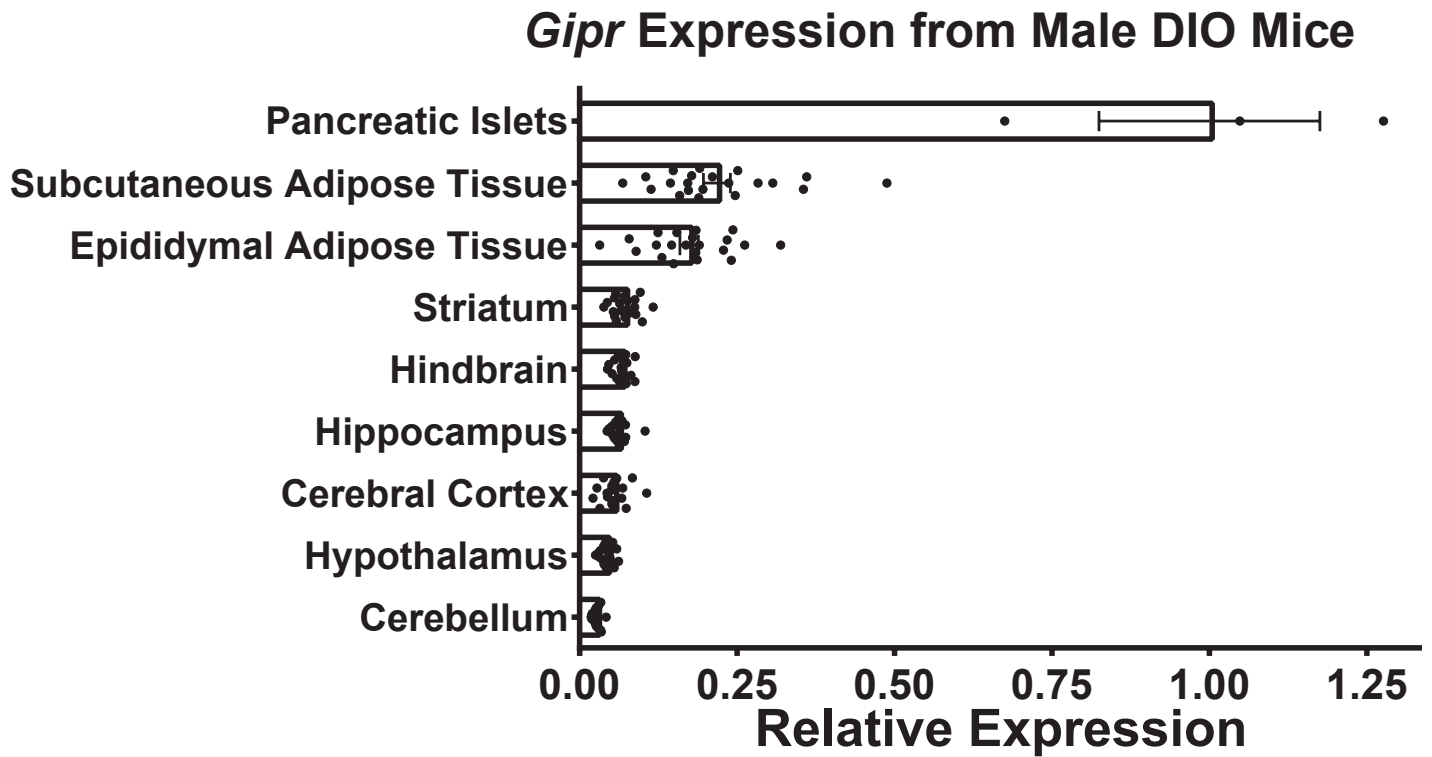

**Supplemental Figure 5. *Gipr* Expression in pancreatic islets, adipose tissue, and brain sections from DIO mice.**

Relative RNA expression of *Gipr* exons 9-10 relative to *Eef2* in tissues from male DIO mice fed HFD for 12 weeks in isolated pancreatic islets (n = 3 pooled islets); white adipose tissue (WAT) and brain sections (n = 21 mice).

Data are presented as mean values  $\pm$  SEM.

### **Supplemental Table and Legend**

**Supplemental Table 1. Mean noncompartmental pharmacokinetic parameter estimates following single IV or IP administration of LA-Agonist to CD-1 mice**

| Route | Dose (mg/kg) | N | AUC <sub>0-inf</sub> (hr*µg/mL) | CL or CL/F (mL/hr/kg) | t <sub>1/2,z</sub> (hr) | F (%) |
|-------|--------------|---|---------------------------------|-----------------------|-------------------------|-------|
| IV    | 5            | 3 | 1510                            | 3.32                  | 66.7                    | --    |
| IP    | 5            | 3 | 1580                            | 3.18                  | 71.3                    | ~100  |

AUC<sub>0-inf</sub> = area under the plasma concentration-time curve from time 0 to infinity; CL = clearance after IV administration; CL/F = apparent CL after IP administration; F = bioavailability after IP administration; IP = intraperitoneal; IV = intravenous; N = number of animals; t<sub>1/2,z</sub> = half-life associated with the terminal phase.

### **Supplemental Data Legend**

**Supplemental Data 1 (Excel File). Metabolic profiling of plasma from DIO mice.**

Heat map of statistically significant biochemicals profiled in this study. Red and green shaded cells indicate  $p \leq 0.05$  (red indicates that the mean values are significantly higher for that comparison; green values significantly lower). Light red and light green shaded cells indicate  $0.05 < p < 0.10$  (light red indicates that the mean values trend higher for that comparison; light green values trend lower). Standard statistical analyses were performed in ArrayStudio on log transformed data using Welch's two-sample t-test to test whether two unknown means are different from two independent populations with  $p < 0.05$  indicating statistical significance. To correct for multiple comparisons, the q-value method for False Discovery
