# Supplementary material for: Chronic glucose-dependent insulinotropic polypeptide receptor (GIPR) agonism desensitizes adipocyte GIPR activity mimicking functional GIPR antagonism
Source: PubMed Central journal article supplement (PMC7536395; doi:10.1038/s41467-020-18751-8), 2020-10-05
Supplement: 41467_2020_18751_MOESM3_ESM.pdf [file 41467_2020_18751_MOESM3_ESM.pdf]

**Title:** Supplemental Data 1. Metabolic profiling of plasma from DIO mice.

**Description:** Heat map of statistically significant biochemicals profiled in this study. Red and green shaded cells indicate  $p \leq 0.05$  (red indicates that the mean values are significantly higher for that comparison; green values significantly lower). Light red and light green shaded cells indicate  $0.05 < p < 0.05$  indicating statistical significance. To correct for multiple comparisons, the q-value method for False Discovery
